# Supplementary material
Source: Research Square preprint supplement (doi:10.21203/rs.3.rs-9534154/v1)
Supplement: Supplementary file 1 [file 5a5d1f300d483b32ce9a34ef.docx]

**Supplementary Table 1**. Primary cancer type groups

| **Cancer Type Group** | **Cancer Types** |
| --- | --- |
| Brain and Nervous System | Includes cancers of the brain, meninges, and other nervous system structures |
| Breast | Includes breast cancers |
| Endocrine | Includes cancers of the thymus, thyroid gland, and other endocrine glands |
| Gastrointestinal | Includes cancers of the anus and anal canal, colon, rectum, rectosigmoid junction, other digestive organs, small intestine, esophagus, gallbladder, liver and bile ducts, other biliary tract, pancreas, and stomach |
| Genitourinary | Includes cancers of the ureter, urinary bladder, penis, prostate, kidney, kidney renal pelvis, and testis |
| Gynecologic | Includes cancers of the cervix, vagina, vulva, ovary, retroperitoneum and peritoneum, and uterus |
| Head and Neck | Includes cancers of the lip, accessory sinuses, nasal cavity and middle ear, nasopharynx, pyriform sinus, base of tongue, floor of mouth, gum, hypopharynx, larynx, palate, oropharynx, other oral cavity sites, other parts of tongue, tonsil, other salivary glands, and parotid gland |
| Lung | Includes cancers of the bronchus, lung, and other respiratory organs |
| Sarcoma | Includes cancers of bones, joints, and articular cartilage; bones, joints, and other connective tissue; and connective subcutaneous tissue |
